# Conflict between heterozygote advantage and hybrid incompatibility in haplodiploids (and sex chromosomes)

Ana-Hermina Ghenu<sup>\*,1</sup>, Alexandre Blanckaert<sup>\*,1</sup>, Roger K. Butlin<sup>2,3</sup>, Jonna Kulmuni<sup>2,4</sup>, and Claudia Bank<sup>#,1,5</sup>

September 30, 2017

## Affiliations:

<sup>1</sup>Instituto Gulbenkian de Ciência, Rua da Quinta Grande 6, Oeiras, 2780-156, Portugal

<sup>2</sup>Department of Animal and Plant Sciences, University of Sheffield, Western Bank, Alfred Benny Building, Sheffield S10 2TN, UK

<sup>3</sup>Department of Marine Sciences, University of Gothenburg, Guldhedsgatan 5a, 41320 Gothenburg, Sweden

<sup>4</sup>Centre of Excellence in Biological Interactions, Department of Biosciences, 00014 University of Helsinki, Finland

<sup>5</sup>Kavli Institute for Theoretical Physics, University of California at Santa Barbara, Santa Barbara, CA 93106-4030

## Keywords:

Hybridization, heterosis, epistasis, haplodiploidy, fitness landscape, speciation

## Correspondence:

Claudia Bank, Instituto Gulbenkian de Ciência, Rua da Quinta Grande 6, Oeiras, 2780-156, Portugal  
evodynamics@gmail.com

\*These authors contributed equally.

## Running title:

Heterosis *versus* hybrid breakdown

## 1 Abstract

2 In many diploid species the sex chromosomes play a special role in mediating reproductive  
3 isolation. In haplodiploids (i.e., females are diploid and males haploid), the whole genome  
4 behaves similar to the X/Z chromosomes of diploids, and thus haplodiploid systems can serve  
5 as a model for the role of sex chromosomes in speciation and hybridization. A previously  
6 described population of Finnish *Formica* wood ants displays genome-wide signs of ploidy  
7 and sexually antagonistic selection resulting from hybridization. Here, hybrid diploid females  
8 have increased survivorship but hybrid haploid males are inviable. In order to understand how  
9 this unusual natural population may sustain this antagonistic selection for hybrid status, we  
10 developed a mathematical model with hybrid incompatibility, female heterozygote advantage,

11 recombination, and assortative mating. The rugged fitness landscape resulting from the  
12 conflict between heterozygote advantage and hybrid incompatibility results in sexual conflict  
13 in haplodiploids, which is absent in diploids. Thus, whereas heterozygote advantage always  
14 promotes long-term polymorphism in diploids, we find various outcomes in haplodiploids  
15 in which the conflict can be resolved either in favor of males, females, or via maximizing  
16 the number of introgressed individuals. We fit our model to data from the Finnish wood  
17 ant population in order to discuss its potential long-term fate. We highlight the general  
18 implications of our results for speciation and hybridization in haplodiploids versus diploids,  
19 and how such fitness conflicts could contribute to the outstanding role of sex chromosomes  
20 as hotspots of sexual conflict and genes involved in speciation.

## 21 Introduction

22 Haplodiploids are an emerging system for speciation genetics (Koevoets and Beukeboom,  
23 2009; Kulmuni and Pamilo, 2014; Lohse and Ross, 2015; Knecht et al., 2017). Although  $\approx 20\%$   
24 of animal species are haplodiploid (comprising most *Hymenopterans*, some arthropods, thrips  
25 and *Hemipterans*, and several clades of beetles and mites; Crozier and Pamilo, 1996; Evans  
26 et al., 2004; de la Filia et al., 2015), little evolutionary theory has been developed specifically  
27 for speciation in haplodiploids (Koevoets and Beukeboom, 2009). Under haplodiploidy with  
28 arrhenotoky (hereafter simply haplodiploidy; Suomalainen et al., 1987), males develop from  
29 the mother's unfertilized eggs and are haploid, whereas eggs fertilized by fathers result in  
30 diploid females. Since this mode of inheritance is from a theoretical viewpoint similar to  
31 that of the X/Z chromosome, most work on speciation of haplodiploids comes from the rich  
32 literature of sex chromosome evolution (Jablonka and Lamb, 1991; Presgraves, 2008; Johnson  
33 and Lachance, 2012; Lohse and Ross, 2015). An important similarity between haplodiploids  
34 and X/Z chromosomes is that recessive mutations in the haploid sex are exposed to selec-  
35 tion, but they are masked in diploids. This is expected to lead to faster evolution in the sex  
36 chromosomes (Charlesworth et al., 1987) that may partly underlie the large-X effect (Pres-  
37 graves, 2008). The large-X effect refers to the observation that the sex chromosomes seem  
38 to play a special role in speciation by acting as the strongest barrier for gene flow between  
39 hybridizing lineages across different species (Höllinger and Hermisson, 2017). Similarly, hap-  
40 lodiploid species have been suggested to acquire reproductive isolation earlier and speciate  
41 faster than diploid species (Lohse and Ross, 2015; Lima, 2014). Although the factors influ-  
42 encing haplodiploid and X/Z chromosome evolution are not expected to be exactly the same  
43 (e.g. movement of sexually antagonistic genes to the sex chromosomes, dosage compensation  
44 between the sex chromosomes and autosomes, and turnover of sex chromosomes cannot occur  
45 in haplodiploids; Abbott et al., 2017), by studying haplodiploid models we can both improve  
46 our understanding of how speciation happens in the large subgroup of the animal kingdom  
47 that is haplodiploid, and gain new insights into the role of X/Z chromosomes in speciation  
48 for diploid species.

49 Recent studies have shown that hybridization and resulting gene flow between diverging  
50 populations may be important players in the speciation process since signs of hybridiza-  
51 tion and introgression are being observed ubiquitously in natural populations (Mallet, 2005;  
52 Dieckmann and Doebeli, 1999; Schluter, 2009; Schluter and Conte, 2009; Seehausen et al.,  
53 2014). When a hybrid population is formed, various selective forces may act simultaneously  
54 to either increase or decrease hybrid fitness, thus dictating the fate of the metapopulation.  
55 One commonly documented finding is hybrid incompatibility (Presgraves, 2008; Fraïsse et al.,  
56 2014; Chen et al., 2016), where combinations of alleles at different loci interact to confer poor  
57 fitness when homozygous in a hybrid individual (Bateson, 1909; Dobzhansky, 1936; Muller,

58 1942; Orr, 1995). In a hybrid population, the existence of hybrid incompatibility reduces  
59 the mean fitness of the metapopulation. This deficit can be resolved either through rein-  
60 forcement (evolution of increased premating isolation to avoid production of unfit hybrids;  
61 Servedio and Noor, 2003), or by purging (demographic swamping leading to extinction of one  
62 of the local populations/species; Wolf et al., 2001). On the other hand, hybridization can  
63 transfer adaptive genetic variation from one lineage to another (Heliconius Genome Consor-  
64 tium, 2012; Song et al., 2011; Whitney et al., 2010) and may result in overall heterosis (also  
65 known as hybrid vigor): a higher fitness of hybrids as compared to their parents (Schwarz  
66 et al., 2005; Chen, 2013; Bernardes et al., 2017). Heterosis can stabilize polymorphisms by  
67 conferring a fitness advantage to hybrids, and thus favors the maintenance of hybridization  
68 either through the improved exploitation of novel ecological niches or the masking of recessive  
69 deleterious mutations. Therefore hybrid incompatibility acts to avert ongoing hybridization  
70 while heterosis favors the maintenance of hybrids.

71 One example of the simultaneous action of hybridization-averse and hybridization-favoring  
72 forces is found in a hybrid population of *Formica polyctena* and *F. aquilonia* wood ants in  
73 Finland (Kulmuni et al., 2010; Kulmuni and Pamilo, 2014; Beresford et al., 2017). Here, it  
74 has been reported that hybrid (haploid) males do not survive to adulthood, whereas (diploid)  
75 females have higher survivorship when they carry many introgressed alleles as heterozygotes  
76 (i.e., heterozygous for alleles originating from one of the parental species in a genomic back-  
77 ground otherwise from the other parental species). Thus, a combination of hybrid incom-  
78 patibility and heterosis seems to dictate the dynamics of the population, in both ploidy- and  
79 sex-specific manner: hybrid haploid males suffer a fitness cost while diploid hybrid females  
80 can have a selective advantage over parental ones. Here, the differences in ploidy create a  
81 sexual conflict which would be absent if the same rugged fitness landscape (i.e., the complex  
82 relationship between genotypes and fitness created via hybrid incompatibility and heterozy-  
83 gote advantage) occurred on diploid autosomes.

84 When both hybridization-averse and hybridization-favoring forces are acting, the long-  
85 term resolution of a hybridizing population is difficult to foresee: will hybridization eventually  
86 result in either complete speciation or extinction of one of the populations involved? Alter-  
87 natively, can it represent an equilibrium maintained stably on an evolutionary time scale?  
88 Furthermore, will the probability of these outcomes depend on ploidy? In other words, is  
89 one of these outcomes more probable when interacting genes are found on a “haplodiploid”  
90 X/Z chromosome than when they exist on a “diploid” autosome?

91 We here develop and analyze a population-genetic model of an isolated hybrid population  
92 in which both hybridization-averse and hybridization-favoring forces are acting, and we study  
93 the evolutionary outcomes in both haplodiploid and (fully) diploid genetic systems. The rich  
94 dynamics of the haplodiploid model can result in four possible evolutionary stable states de-  
95 pending on the strength of heterozygote advantage *versus* hybrid incompatibility, the strength  
96 of recombination, and the degree of assortative mating. This includes a case of symmetric  
97 coexistence (where all diversity is maintained) where both alleles can be maintained despite  
98 the ongoing genetic conflict, and thus long-term hybridization is favored. We find that the  
99 dynamics differ between haplodiploid and diploid systems, and that unlike in previous mod-  
100 els of sexual conflict in haplodiploid populations (Kraaijeveld, 2009; Albert and Otto, 2005),  
101 sexual conflict is not necessarily resolved in favor of the females. Indeed, a compromise may  
102 be reached at which the average fitness of females is decreased to rescue part of the fitness of  
103 males. Moreover, fitting of the data from the natural hybrid population suggests that, under  
104 the assumption of an equilibrium, the Finnish ant population may represent an example of  
105 compromise between male costs and female benefits through asymmetric coexistence. We  
106 discuss our findings with respect to the long-term effects of hybridization, the potential for

Table 1: List of model parameters.

| Symbol               | Parameter                                                                                                                                                                                                                                                                | Limits                             |
|----------------------|--------------------------------------------------------------------------------------------------------------------------------------------------------------------------------------------------------------------------------------------------------------------------|------------------------------------|
| $\sigma, \omega$     | <b>Strength of heterozygote advantage</b> , resulting in fitness $\omega = (1 + \sigma)$ or $\omega^2 = (1 + \sigma)^2$ of introgressed or double heterozygous diploid hybrids, respectively.                                                                            | $\omega - 1 = \sigma > 0$          |
| $\gamma_1, \gamma_2$ | <b>Strength of fully recessive negative epistasis</b> , resulting in fitness $(1 - \gamma_1)$ for $A_+B_-$ homozygous diploid hybrids and $A_+B_-$ hybrid haploid males, and $(1 - \gamma_2)$ for $A_-B_+$ homozygous diploid hybrids and $A_-B_+$ hybrid haploid males. | $0 \leq \gamma_1, \gamma_2 \leq 1$ |
| $\rho$               | <b>Recombination rate</b> between locus <b>A</b> and <b>B</b> .                                                                                                                                                                                                          | $0 \leq \rho \leq 0.5$             |
| $\alpha$             | <b>Strength of assortment</b> via genotype matching, where $\alpha = 0$ represents random mating, $\alpha > 0$ represents assortative mating among conspecifics, and $\alpha < 0$ represents assortative mating between heterospecifics.                                 | $-1 \leq \alpha \leq 1$            |

107 speciation in haplodiploid versus diploid species, and with respect to their relevance for X-  
 108 or Z-linked alleles in diploid individuals.

## 109 Materials and Methods

### 110 The model

111 We model an isolated haplodiploid or diploid hybrid population with individuals from  
 112 two founder populations  $P_+$  and  $P_-$ . Note that throughout the manuscript, we preferentially  
 113 refer to (sub-) populations rather than species; in those instances in which we use the term  
 114 ‘species’ it is in order to emphasize that the two populations have diverged sufficiently for  
 115 (potentially strong) hybrid incompatibilities to exist. We assume discrete generations and  
 116 consider two loci, **A** and **B**. Each locus has two alleles, the ‘+’ allele ( $A_+$  or  $B_+$ ) inherited  
 117 from population  $P_+$  or the ‘-’ allele ( $A_-$  or  $B_-$ ) inherited from population  $P_-$ . We refer to  
 118 ‘hybrids’ as individuals that carry two alleles from each of the two parental populations and  
 119 cannot be assigned to either parental background. We refer to ‘introgressed’ individuals as  
 120 those genotypes for which three of the four alleles are from the same parental population;  
 121 these genotypes are identical to those produced by hybridization followed by backcrossing.  
 122 We assume an equal sex ratio, and ignore new or recurrent mutation and genetic drift (i.e.,  
 123 we assume an effectively infinite population size). The life cycle is as follows (Fig. S1; see  
 124 also Table 1 for a list of model parameters):

- 125 1. viability (or survival) selection, where heterosis is modeled as a heterozygote advan-  
 126 tage,  $\sigma$ , and hybrid incompatibility is modeled as a fully recessive negative epistasis,  $\gamma_1$   
 127 and  $\gamma_2$  (further details are provided below and in Figure 1);
- 128 2. mating, either randomly or via genotype matching with assortment strength  $\alpha$  as de-  
 129 tailed below;
- 130 3. recombination at rate  $\rho$ .

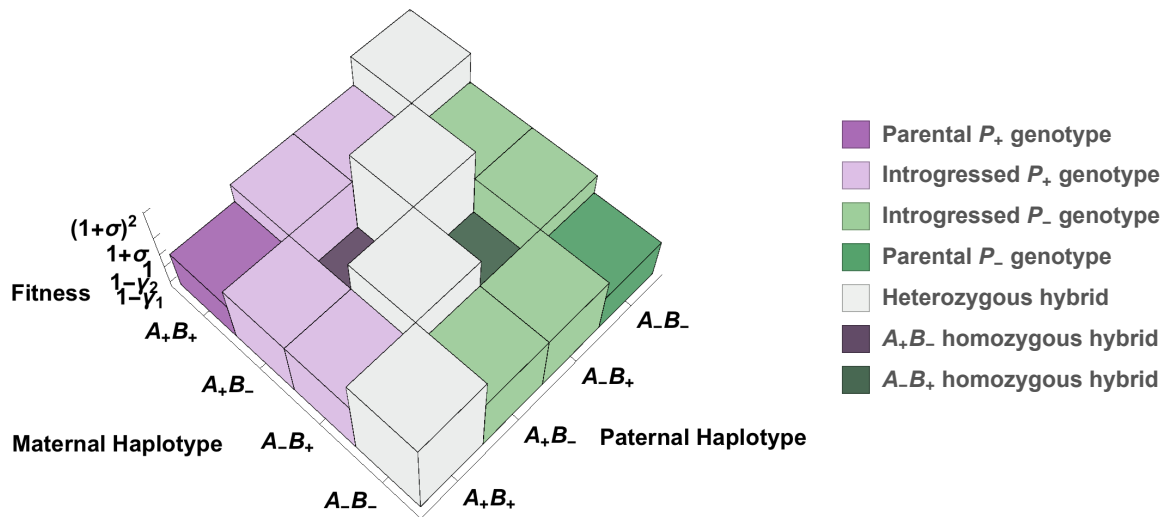

(a) Fitness Landscape for Diploid Individuals

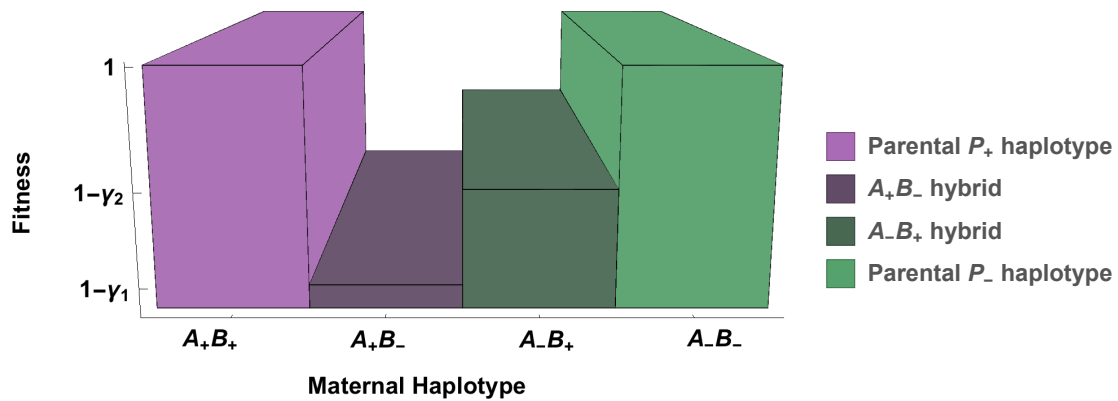

(b) Fitness Landscape for Haploid Males

Figure 1: Three-dimensional fitness landscapes for the (a) diploid and (b) haploid genotypes. Panel a) corresponds to females in the haplodiploid model and all individuals in the diploid model. Individuals heterozygous at both loci (heterozygous hybrids) reside on a high fitness ridge (in white), whereas individuals homozygous at both loci (homozygous hybrids) suffer from reduced fitness due to negative epistasis. Panel b) shows the fitness landscape for haploid individuals (i.e. males) in the haplodiploid model. This landscape is identical to a transect from Panel a) for genotypes homozygous at both loci.

## 131 Viability selection

132 The fitness landscape described here (Fig. 1) is inspired by the situation observed in  
133 Finnish *Formica* ants (Kulmuni et al., 2010; Kulmuni and Pamilo, 2014; Beresford et al.,  
134 2017). There, the authors discovered heterosis in the diploid females but recessive incom-  
135 patibilities expressed in the haploid males. This creates a genomic conflict where the same  
136 alleles that are favored in heterozygote females are selected against in hybrid haploid males.  
137 In the haplodiploid genetic system, males possess only one copy of each locus so they cannot  
138 be heterozygous and, thus, cannot experience heterozygote advantage (Fig. 1(b)). Therefore,  
139 a fitness scheme with heterozygote advantage and recessive incompatibilities expresses itself  
140 as a sexual conflict in haplodiploids.

141 In our model, selection for heterozygous individuals is multiplicative with respect to  
142 the number of heterozygous loci: introgressed individuals with one heterozygous locus have  
143 fitness  $1 + \sigma$ , whereas heterozygous hybrid individuals are heterozygous at both loci and  
144 have survivorship  $(1 + \sigma)^2$  (Fig. 1(a)). Note that when  $\gamma_1 = \gamma_2 = 1$ , haploid hybrid males  
145 and homozygous hybrid zygotes are produced but do not survive to adulthood. Finally, the  
146 recessive epistatic incompatibility parameter  $\gamma_1$  acts on individuals homozygous or haploid  
147 for the  $A_+B_-$  haplotype, and  $\gamma_2$  acts on individuals homozygous or haploid for the  $A_-B_+$   
148 haplotype (without loss of generality, we assume  $\gamma_1 \geq \gamma_2$ ). Thus, epistasis in this model can  
149 be asymmetric, reflecting, for example, two Dobzhansky-Muller incompatibilities of different  
150 strength that have accumulated in a negligible recombination distance between the same  
151 chromosome pairs. Note that the classical case of a single Dobzhansky-Muller incompatibility  
152 is recovered when  $\gamma_2 = 0$ .

## 153 Assortative mating

154 Prezygotic isolation via assortative mating is an important mechanism that could mediate  
155 the conflict between heterozygote advantage and epistasis modeled here. In the Finnish wood  
156 ant population that inspired our model (Kulmuni and Pamilo, 2014), almost all egg-laying  
157 queens collected had been inseminated by males of the same genetic group, indicating that  
158 prezygotic isolation mechanisms are likely operating to result in assortative mating. In this  
159 case, assortative mating could arise both via choosiness of mating partners, via genotype-  
160 dependent development times, or via other post-mating prezygotic mechanisms. We imple-  
161 mented assortment via genotype matching (reviewed in Kopp et al., in press), where the  
162 proportion of matings depends on the genetic distance between two mating partners (and  
163 their respective frequencies in the population). We use quadratic assortment (e.g., De Cara  
164 et al., 2008), which results in assortative mating without costs of choosiness but with sex-  
165 ual selection. The mating probability of a pair of male and female genotypes,  $\{g_f, g_m\}$ , is  
166  $\frac{1}{2}(1 - \alpha)d_{g_f, g_m}\chi_{g_f}\chi_{g_m}$ , where  $d_{g_f, g_m}$  is the Hamming distance between the female and male  
167 genotypes (where the male haplotype is doubled in the haplodiploid model) and  $\chi_{g_f}, \chi_{g_m}$  are  
168 the respective genotype frequencies.

## 169 Simulations

170 Derivations, simulations, and data fitting were performed in *Mathematica* (v 10.4.1.0;  
171 Wolfram Research, Inc., 2016), and are supplied as Online Supplement. Equilibrium geno-  
172 type frequencies were obtained numerically when possible, or based on simulations until the  
173 difference between genotype frequencies between two consecutive generations was smaller  
174 than  $10^{-8}$  (or stopped after  $10^5$  generations without convergence).

## 175 Estimating genotype frequencies from a natural ant population

176 In order to compare our model with data from the natural, hybridizing Finnish ant pop-  
177 ulation, we estimated the different genotype frequencies of parental *F. polyctena*-like and  
178 *F. aquilonia*-like individuals at pre-selection and post-selection life stages for males and fe-  
179 males (Fig. S1(a)). We did not estimate the frequencies of introgressed or hybrid individuals.  
180 We used the genotype frequencies at different life-stages estimated in Kulmuni and Pamilo  
181 (2014) from nine microsatellite loci. For males, eggs were used to estimate pre-selection  
182 frequencies; the sum of adults and reproductive fathers was used to estimate post-selection  
183 frequencies. For females, eggs were used for pre-selection frequencies and the sum of young  
184 and old queens was used for post-selection frequencies. We used two different estimates for  
185 the number of parental females: individuals with exactly zero loci heterozygous for an intro-  
186 gressed allele, and individuals with one or more loci homozygous for the parental allele (i.e.,  
187 the “diagnostic allele” in Kulmuni and Pamilo, 2014). In order to make these data comparable  
188 to our model, we rescaled the genotype frequencies such that 10.3% of the population is from  
189 the *F. polyctena*-like sub-population and 89.7% from the *F. aquilonia*-like sub-population, as  
190 estimated from the observed abundances of *F. polyctena*-like and *F. aquilonia*-like individuals  
191 from nests in the hybrid population collected between 1996-2012 (Table S1). Assuming that  
192 the natural population is at equilibrium, we fit the data (Table S2) to the model by calcu-  
193 lating the sum of squared differences between the observed data and predicted equilibrium  
194 frequencies from 40600 parameter combinations.

## 195 Results

196 In this section, we describe the dynamics of a hybrid population under our model, with  
197 a particular focus on quantifying the differences between the haplodiploid and the diploid  
198 model. Two parameter ranges are of particular interest:

- 199 1. The case of free recombination and strong epistasis (i.e., large  $\gamma_1, \gamma_2$ ) most likely resem-  
200 bles that of the natural ant hybrid population that inspired the model. Here, hybrid  
201 incompatibilities are found between chromosomes, and they are strong enough to erase  
202 a large fraction of male zygotes during development.
- 203 2. The case of low recombination is most relevant for the effects of a fitness landscape  
204 with epistasis (i.e., a “rugged” landscape) in X or Z chromosomes. Here, epistasis could  
205 arise, for example, through interactions between regulatory regions and their respective  
206 genes.

## 207 Evolutionary scenarios

208 Below, we describe four different types of evolutionary stable states (i.e., equilibrium  
209 scenarios) of the model, which represent long-term solutions to the conflict between the  
210 hybridization-averse force of recessive negative epistasis and the hybridization-favoring het-  
211 erozygote advantage. The population will attain these equilibria if no further pre- or post-  
212 zygotic mechanisms or other functional mutations appear. Next, we provide various necessary  
213 and sufficient analytical conditions for these scenarios. Figure 2 illustrates the potential equi-  
214 libria by means of phase diagrams.

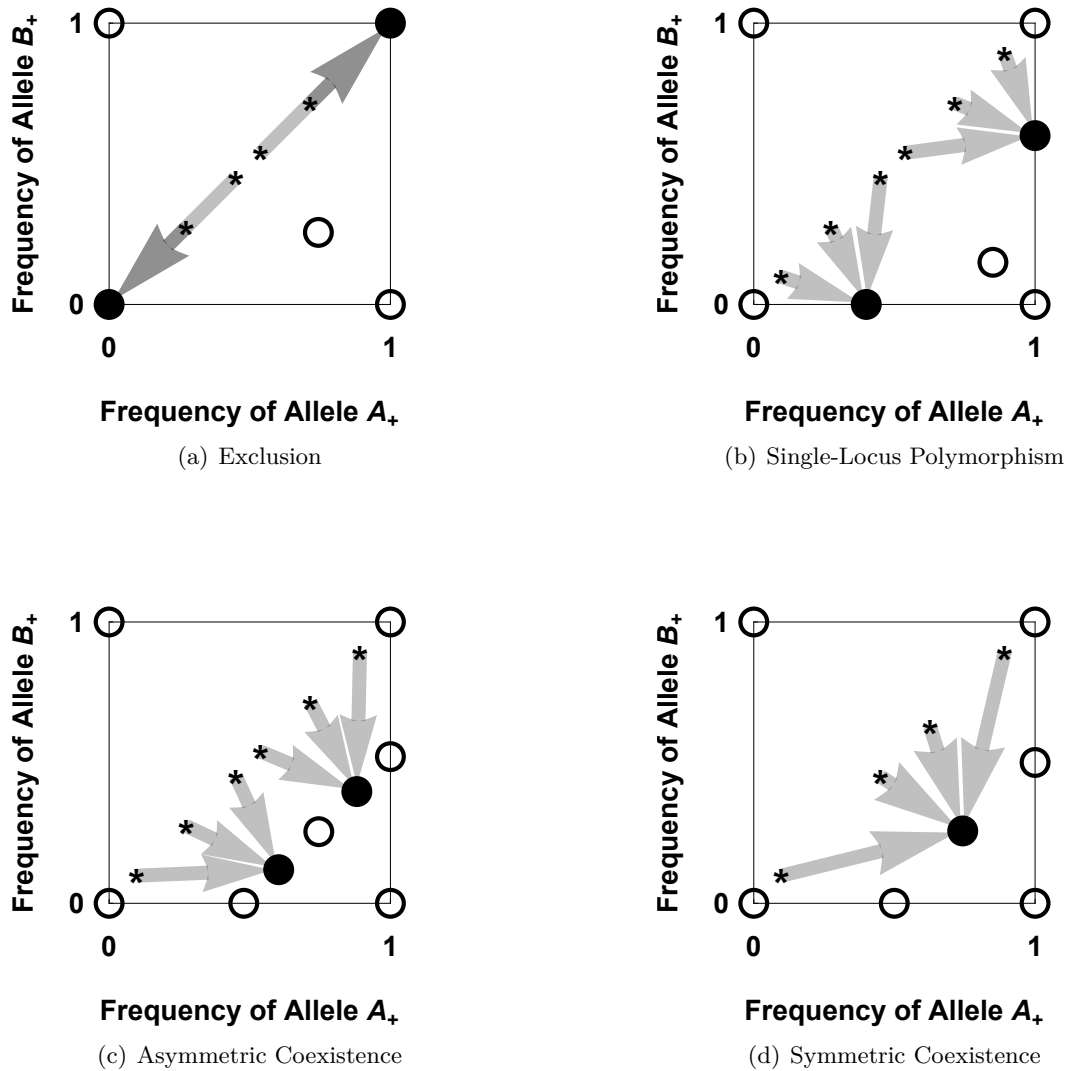

Figure 2: Phase-plane diagrams illustrating possible evolutionary scenarios in the haplodiploid model. The filled black dots show locally stable equilibria and the empty dots show unstable ones. The gray arrows show the basin of attraction starting from secondary contact scenarios (black crosses on the line at  $p_{B+} = p_{A+}$ ). Panel (a) illustrates exclusion: There are 2 external locally stable equilibria, each corresponding to the fixation of a parental population haplotype. (Here,  $\sigma = 0.02$ ,  $\gamma_1 = 0.9$ ,  $\gamma_2 = 0.11$ ,  $\rho = 0.5$ , and  $\alpha = 0$ .) Panel (b) represents a single-locus polymorphism. Only one locus is polymorphic, leading to the maintenance of the weaker of the two incompatibilities (the  $A_-B_+$  interaction). (Here,  $\sigma = 0.009$ ,  $\gamma_1 = 0.11$ ,  $\gamma_2 = 0.002$ ,  $\rho = 0.5$ , and  $\alpha = 0$ .) Panel (c) corresponds to asymmetric coexistence. Two internal equilibria are locally stable, with one allele close to fixation. This scenario minimize the expression of the strongest interaction  $A_+B_-$ . (Here,  $\sigma = 0.03$ ,  $\gamma_1 = 0.11$ ,  $\gamma_2 = 0.0013$ ,  $\rho = 0.5$ , and  $\alpha = 0$ .) Panel (d) shows symmetric coexistence. Frequencies of alleles  $A_-$  and  $B_-$  are symmetric around 0.5, with  $p_{B+} = 1 - p_{A+}$ . This scenario maximizes the formation of female heterozygous hybrids. (Here,  $\sigma = 0.09$ ,  $\gamma_1 = 0.3$ ,  $\gamma_2 = 10^{-4}$ ,  $\rho = 0.5$ , and  $\alpha = 0$ .)



## 215 Exclusion

216 The *exclusion* scenario corresponds to the hybrid population becoming identical to one  
217 of the two parental populations, either  $P_+$  or  $P_-$ , and the other parental population being  
218 therefore excluded. It occurs when both alleles from one of the founder subpopulations are  
219 purged, leading to a monomorphic stable state of the population (Fig. 2(a)). In this case, the  
220 initial frequency of  $A_+B_+$  versus  $A_-B_-$  individuals mainly determines the outcome (i.e., the  
221 population is swamped by the majority subpopulation). As a rule of thumb, this outcome  
222 is observed when recombination is frequent and when the hybridization-averse force of neg-  
223 ative epistasis is strong as compared with the hybridization-favoring heterozygote advantage  
224 ( $\gamma_1, \gamma_2 \gg \sigma$ ).

225 With regard to sexual conflict in the haplodiploid model, exclusion can be interpreted  
226 as a victory of the males because all polymorphism is lost and no low-fitness hybrid males  
227 are produced. Conversely, since all polymorphism is lost, females “lose” in this case and  
228 neither high-fitness introgressed (i.e., those individuals carrying only one ‘foreign’ allele) nor  
229 highest-fitness heterozygous hybrid females are produced.

## 230 Single-locus polymorphism

231 A *single-locus polymorphism* occurs when one allele is purged from the population but the  
232 other locus remains polymorphic at equilibrium (Fig. 2(b)). Because this is possible for either  
233 of the two loci, two such equilibria exist simultaneously, which are reached depending on the  
234 initial haplotype frequencies. This outcome is observed when recombination is frequent, epis-  
235 tasis is asymmetric ( $\gamma_1 \neq \gamma_2$ ), and heterozygote advantage is small ( $\gamma_1 \gg \sigma$ ). Like asymmetric  
236 coexistence below, this case represents a compromise between the hybridization-averse and  
237 hybridization-favoring forces of negative epistasis and heterozygote advantage, and is reached  
238 by maximizing the number of introgressed individuals of one founder subpopulation.

239 In the haplodiploid model, this can be seen as a male-dominated compromise because,  
240 since one locus is fixed, one epistatic interaction has disappeared and few low-fitness hybrid  
241 males are produced. In females, high-fitness introgressed female frequencies are maximized  
242 but, since one locus is fixed, the highest-fitness heterozygous hybrid females are not pro-  
243 duced at all. This scenario represents a male-dominated compromise because male costs are  
244 mitigated but females cannot reap the highest fitness of the heterozygote advantage.

245 Single-locus polymorphism is never stable in the diploid model because it can always be  
246 invaded by the asymmetric coexistence scenario described below. In a diploid population  
247 transiently at single-locus polymorphism, a rare mutant at the second locus will always begin  
248 as heterozygote and therefore reap the advantage of being a heterozygote hybrid long before  
249 it suffers the epistatic cost of being a homozygote hybrid.

## 250 Asymmetric coexistence

251 “*Asymmetric*” *coexistence* occurs when all four haplotypes remain in the population  
252 and the frequency of introgressed individuals of one founder subpopulation is maximized  
253 (Fig. 2(c)). Because this can be achieved in two ways, two possible equilibria reside off the  
254 diagonal line  $p_B = 1 - p_A$  (where  $p_A$  and  $p_B$  denote the allele frequencies of the ‘-’ allele at  
255 the respective locus), and the initial contribution of different haplotypes determines which  
256 equilibrium will be attained. Like the single-locus polymorphism, this equilibrium represents  
257 a compromise between hybridization-averse and hybridization-favoring forces that is reached  
258 by maximizing the number of introgressed individuals. Our simulations demonstrate that  
259 this scenario is rarely present in haplodiploids, and it generally involves asymmetric epistasis  
260 and intermediate-strength heterozygote advantage.

261 In the haplodiploid model, asymmetric coexistence can be seen as a female-dominated  
262 compromise. Unlike the single-locus polymorphism scenario, both loci are polymorphic and  
263 some double-heterozygous hybrid females are produced. But, unlike the symmetric coexis-  
264 tence scenario described below, females are not victorious over males because such high-fitness  
265 hybrid females are produced only at low frequencies.

## 266 Symmetric coexistence

267 *Symmetric coexistence* occurs when a locally stable equilibrium exists on the diagonal  
268  $p_B = 1 - p_A$ , such that the number of heterozygous hybrids is maximized (Fig. 2(d)). Our  
269 notion of “symmetric” refers to the total fraction of alleles from the  $P_+$  and  $P_-$  founder pop-  
270 ulations segregating at equilibrium, which is equal in this case. Here, prolonged hybridization  
271 is a mutual best-case scenario for both populations. This equilibrium is most likely when  
272 recombination is weak or when the hybridization-favoring force of heterozygote advantage  
273 is strong as compared with the hybridization-averse negative epistasis ( $\sigma \geq \gamma_1, \gamma_2$ ). In the  
274 haplodiploid model, symmetric coexistence represents a victory for the females, because they  
275 maximize their own fitness without regard to the production of unfit hybrid males.

276  
277 The four evolutionary stable states described above usually result in either a single, glob-  
278 ally stable (in the case of symmetric coexistence) or a bistable system, in which two locally  
279 stable equilibria exist. In rare cases and close to bifurcation points, we observe cases of  
280 tristability, which are further described in Figure S2.

## 281 Stability analysis of the model

282 Although the model dynamics are too complex to derive general analytical solutions, we  
283 were able to perform stability analyses for specific cases, which yield information about the  
284 general behavior of the model. In the following, our use of ‘>’ and ‘<’ does not necessarily  
285 imply strict inequalities; we merely did not explicitly study the limiting cases. For ease of  
286 notation, we refer to heterozygote advantage in terms of  $\omega$  below; recall that  $\omega = 1 + \sigma$ .

## 287 Conditions for symmetric coexistence when epistasis is lethal

288 We begin by describing the equilibrium structure when epistasis is lethal, i.e.  $\gamma_1 = \gamma_2 = 1$ ;  
289 this case may resemble that in the natural ant population, in which most hybrid males do  
290 not survive to reproduce. For the haplodiploid model, we obtain a full analytic solution  
291 of the identity, existence and stability of equilibria. Here, only two outcomes are possible:  
292 symmetric coexistence and exclusion (Fig. 3(a)). As necessary and sufficient criterion for  
293 exclusion, we obtain

$$\rho > \frac{\omega^2 - 1}{\omega^2}. \quad (1)$$

294 Thus, exclusion is only possible if heterozygote advantage is not too strong, and if recombi-  
295 nation is breaking up gametes sufficiently often to significantly harm the males.

296 For the diploid model, we can show that no boundary equilibrium is ever stable; asym-  
297 metric and symmetric coexistence are the only two possible outcomes. Although it was not  
298 possible to perform a stability analysis on the internal equilibria, we were able to propose a  
299 condition for asymmetric coexistence, which has been evaluated numerically:

$$\rho > \frac{(\omega^2 - 1)(2\omega^4 - 6\omega^3 + \omega^2 + 6\omega - 2)}{\omega^2(2\omega^2 - 4\omega + 1)(2\omega^2 - 3)} + 2\sqrt{\frac{(\omega - 1)^5(\omega + 1)^2(\omega^3 - \omega^2 - 3\omega + 1)}{\omega^4(2\omega^2 - 4\omega + 1)^2(2\omega^2 - 3)^2}}. \quad (2)$$

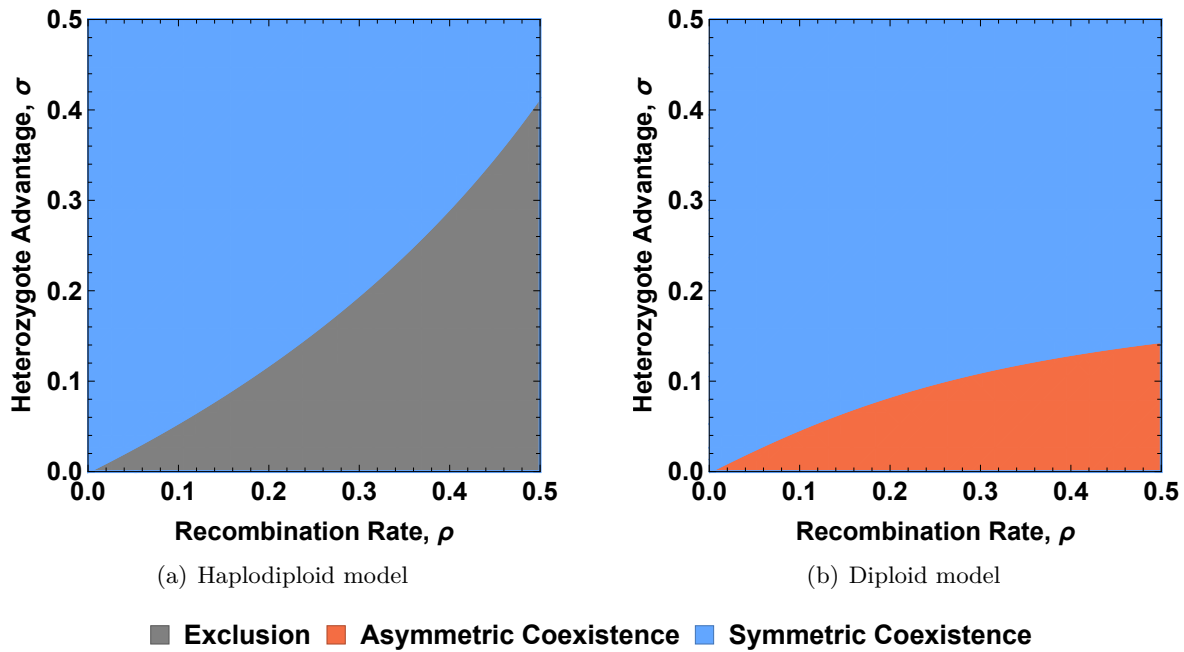

Figure 3: Symmetric coexistence can be locally stable if the heterozygote advantage,  $\sigma$ , is strong enough to compensate for recombination breaking up the parental haplotypes. Here we assume that epistasis is symmetric and lethal ( $\gamma_1 = \gamma_2 = 1$ ). Panel (a) is an illustration of the condition for haplodiploids given in equation (1) and panel (b) of equation (2) for diploids.

300 Although this expression is not very telling, its illustration in Figure 3(b) demonstrates how  
 301 different this criterion is from that of the haplodiploid model. Because in the diploid model  
 302 males benefit from the heterozygote advantage too, asymmetric coexistence is very unlikely.  
 303 Indeed, a heterozygote advantage of  $\omega - 1 = \sigma \approx 0.14$  is sufficient to ensure symmetric co-  
 304 existence for all recombination rates, whereas in the haplodiploid model,  $\sigma > \sqrt{2} - 1 \approx 0.41$   
 305 is necessary for symmetric coexistence independent of the recombination rate.

### 306 General stability conditions in the haplodiploid model

307 Using the results derived for the case of lethal epistasis, and by means of critical exam-  
 308 ination of the existence and stability conditions that we were able to compute analytically,  
 309 we arrived at several illustrative conjectures delimiting the evolutionary outcomes in the  
 310 haplodiploid model when epistasis is not lethal ( $\gamma_1, \gamma_2 \neq 1$ ). These were all confirmed by ex-  
 311 tensive numerical simulations (see Mathematica Online Supplement). Note that assortative  
 312 mating was not considered here.

313 Firstly, strong heterozygote advantage can always override the effect of epistasis. Specif-  
 314 ically, if

$$\omega > \sqrt{2}, \quad (3)$$

315 the evolutionary outcome is always symmetric coexistence, regardless of the values of  $\gamma_1$   
 316 and  $\gamma_2$ . This is true not only for a single pair of interacting loci, but also for an arbitrary  
 317 number of independent incompatibility pairs, because the conflict at each incompatibility  
 318 pair is eventually resolved independently (see also the section on multiple loci below).

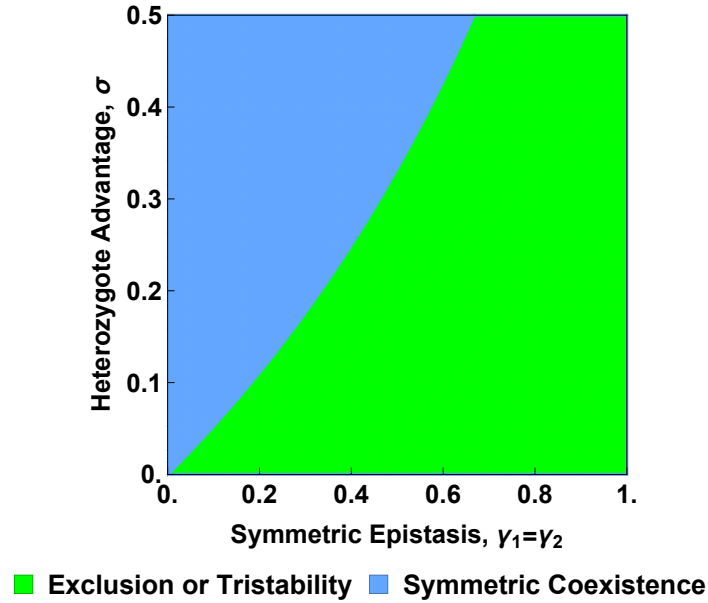

Figure 4: In haplodiploids, symmetric coexistence requires that heterozygote advantage,  $\sigma$ , is strong enough to both compensate for recombination such that the condition in equation 4 is fulfilled (see also Fig. 3(a)), and to overcome the deleterious effects of epistasis, as expressed by condition 5 for symmetric epistasis.

319 Secondly, recombination is a key player to determine whether compromise or exclusion  
 320 can occur. In particular,

$$\rho < \frac{\omega^2 - 1}{\omega^2} \quad (4)$$

321 is a sufficient condition for the observation of symmetric coexistence, independent of the  
 322 strength and symmetry of epistasis. This makes intuitive sense, because the conflict between  
 323 heterozygote advantage and hybrid incompatibility only occurs if gametes are broken up by  
 324 recombination.

325 Thirdly, for symmetric epistasis ( $\gamma_1 = \gamma_2$ ), there are three possible equilibrium patterns:  
 326 symmetric coexistence, exclusion, and tristability of the two former types of equilibria. A  
 327 necessary and sufficient condition for observation of anything but symmetric coexistence is

$$\omega < \sqrt{2} \quad \text{and} \quad \rho > \frac{\omega^2 - 1}{\omega^2} \quad \text{and} \quad \gamma_1 = \gamma_2 > \frac{2(\omega - 1)}{\omega}. \quad (5)$$

328 If the recombination rate  $\rho$  and the epistatic effects  $\gamma_1, \gamma_2$  are very close to this limit,  
 329 there is tristability; if they are far away, there is exclusion (cf. Fig. 4).

330 Finally, for asymmetric epistasis ( $\gamma_1 \neq \gamma_2$ ), the dynamics display the whole range of  
 331 possible evolutionary outcomes: symmetric coexistence, asymmetric coexistence, single-locus  
 332 polymorphism, exclusion, as well as tristability of exclusion *and* symmetric coexistence, and  
 333 single-locus polymorphism *and* symmetric coexistence. The local stability criterion for the  
 334 stability of the monomorphic equilibria (i.e., the criterion for exclusion, or tristability of  
 335 exclusion and symmetric coexistence) is

$$\omega < \sqrt{2} \quad \text{and} \quad \rho > \frac{\omega^2 - 1}{\omega^2} \quad \text{and} \quad \gamma_2 > \frac{2(\omega - 1)}{\omega}. \quad (6)$$

336 Thus, if epistasis is strong as compared with heterozygote advantage, no degree of asym-  
 337 metry is sufficient to promote a compromise between males and females (i.e., single-locus

338 polymorphism or asymmetric coexistence). In fact, we observe the following necessary (but  
339 not sufficient) condition for a single-locus polymorphism:

$$\omega < \sqrt{2} \quad \text{and} \quad \rho > \frac{\omega^2 - 1}{\omega^2} \quad \text{and} \quad \gamma_1 > \frac{2(\omega - 1)}{\omega} \quad \text{and} \quad \gamma_2 < \frac{2(\omega - 1)}{\omega}. \quad (7)$$

340 Hence, only a tight balance between the selective pressures of epistasis and heterozygote  
341 advantage in combination with asymmetry of the hybrid incompatibility promotes a long-  
342 term equilibrium with compromise.

### 343 **An extension to multiple loci**

#### 344 **Incompatibilities involving four loci**

345 Above, we have demonstrated that recombination is an essential player when determining  
346 whether exclusion or coexistence is the long-term outcome in the haplodiploid dynamics. In  
347 order to see how our results change in the (biologically relevant) case of multiple hybrid  
348 incompatibilities, we implemented the dynamics for four loci. Given the complexity of the  
349 system, we considered only lethal incompatibilities, i.e.  $\gamma_i = 1$  for all interactions  $i$ . With  
350 this extension, we consider two scenarios. Firstly, in the “pairwise” case we consider pairs  
351 of independent hybrid incompatibilities, where we assume that the incompatible loci are  
352 located next to each other (locus **A** interacts with locus **B** at recombination distance  $\rho_{12}$ ,  
353 and locus **C** with locus **D** at recombination distance  $\rho_{34}$ ), which leaves four viable male  
354 haplotypes ( $A_+B_+C_+D_+$ ,  $A_+B_+C_-D_-$ ,  $A_-B_-C_+D_+$  and  $A_-B_-C_-D_-$ ). Secondly, in the  
355 “network” case we assume that all loci interact such that only two viable male haplotypes  
356 exist  $A_+B_+C_+D_+$  and  $A_-B_-C_-D_-$ . In both cases, heterozygote advantage is defined as  
357 before, now acting on all four loci multiplicatively.

358 Under this model, we derived the conditions under which exclusion (the purging of all  
359 foreign alleles resulting in a monomorphic equilibrium) is locally stable (cf. Mathematica  
360 Online Supplement). For the pairwise case, exclusion is stable only if heterozygote advantage  
361 is relatively weak:

$$\omega < \min \left[ \frac{1}{\sqrt{1 - \rho_{12}}}, \frac{1}{\sqrt{1 - \rho_{34}}} \right], \quad (8)$$

362 where  $\rho_{ij}$  is the recombination rate between neighboring loci  $i$  and  $j$ . Note that this is  
363 independent of the recombination rate between non-interacting loci, here  $\rho_{23}$ . If  $\rho_{12} = \rho_{34}$ ,  
364 this expression is equivalent to equation 1 (Fig. 3(a)). Overall, this condition indicates that  
365 exclusion (defined as the fixation of one of the parental haplotypes) is less likely with four  
366 interacting loci than with two.

367 For the network case, the condition for stability of exclusion (see also Fig. S3) is

$$\omega < ((1 - \rho_{12})(1 - \rho_{23})(1 - \rho_{34}))^{-\frac{1}{4}}. \quad (9)$$

368 In this scenario, exclusion is a more likely outcome with two incompatibilities than with one.

#### 369 **Incompatibilities involving an arbitrary number of loci**

370 From the results for two and four loci, we derived a conjecture that generalizes to an  
371 arbitrary number of loci. For the pairwise case, equation 8 can be generalized to

$$\omega < \min \left[ \frac{1}{\sqrt{1 - \rho_{ij}}} \right], \quad (10)$$

372 with  $i$  and  $j$  representing neighboring interacting loci. Note that this result holds only if  
373 interacting loci are next to each other on the same chromosome, or if all loci are unlinked (in  
374 which case it simplifies to  $\omega < \sqrt{2}$ ).

375 For the network case, equation (9) generalizes to

$$\omega < \left( \prod_{\substack{i=1 \\ j=i+1}}^{n-1} 1 - \rho_{ij} \right)^{-\frac{1}{n}}, \quad (11)$$

376 with  $i$  and  $j$  neighboring loci and  $n$  the total number of loci in the network. Unlike in the  
377 pairwise case, the results for the network case do not depend on the genetic architecture  
378 (here, the ordering of loci along the genome).

379 We can therefore deduce that, for the pairwise case, exclusion becomes increasingly un-  
380 likely as the number of pairs of independent hybrid incompatibilities involved in the genetic  
381 barrier increases. Conversely, the opposite result is observed for the network case: more  
382 loci make exclusion a more likely outcome, but each additional interaction contributes less  
383 (cf. Fig. S3).

## 384 Increased assortative mating counteracts recombination and heterozygote 385 advantage

386 Increasing the strength of assortative mating,  $\alpha > 0$ , counteracts the hybridization-  
387 favoring effect of heterozygote advantage, because matings between individuals with the  
388 same genotype are more common under stronger, positive assortment. Under sufficiently  
389 large positive  $\alpha$ , exclusion is unavoidable. In general, increasing  $\alpha$  leads to less mainte-  
390 nance of polymorphism in the population (Fig. S4). Conversely, when  $\alpha < 0$ , which means  
391 that individuals prefer to mate with those whose genotype is most different from their own,  
392 polymorphism is more likely to be maintained in the population.

393 Also with assortative mating, recombination remains a key player in determining the  
394 evolutionary outcome. When  $\alpha < 0$  and recombination is small, symmetric coexistence is  
395 possible even in the absence of heterozygote advantage (i.e.,  $\sigma = 0$ ; Fig. S4). Indeed, under  
396 these conditions and assuming epistasis is very strong, (almost) all hybrid males are dead and  
397 only parental males survive. This ‘disassortative’ mating ( $\alpha < 0$ ) creates a bias for the rare  
398 male haplotype. For example, if one female genotype increases in frequency, it will seek mainly  
399 the males of the other parental haplotype to reproduce with (which are currently rare, as  
400 their frequency is directly tied to the frequency of the female at the previous generation. This  
401 will increase their reproductive success leading to an increase of this haplotype frequency.  
402 Therefore, under this mate choice regime, we observe a stable population composed almost  
403 exclusively of the  $A_+B_+$  and  $A_-B_-$  haplotypes.

## 404 Differences between the haplodiploid and the diploid systems

405 As described above and illustrated in Figure 5, the resulting haplodiploid dynamics display  
406 a wider range of possible evolutionary outcomes than the diploid dynamics. Because both  
407 males and females profit from heterozygote advantage in the diploid model, polymorphism  
408 is always maintained; in other words, even the smallest amount of heterozygote advantage  
409 promotes the creation or maintenance of diversity in diploids (Table S3). Conversely, in  
410 the haplodiploid model, polymorphism can be lost either at one or both loci, resulting in  
411 a single-locus polymorphism or exclusion. Thus, alleles responsible for incompatibilities are  
412 more effectively purged in the haplodiploid model.

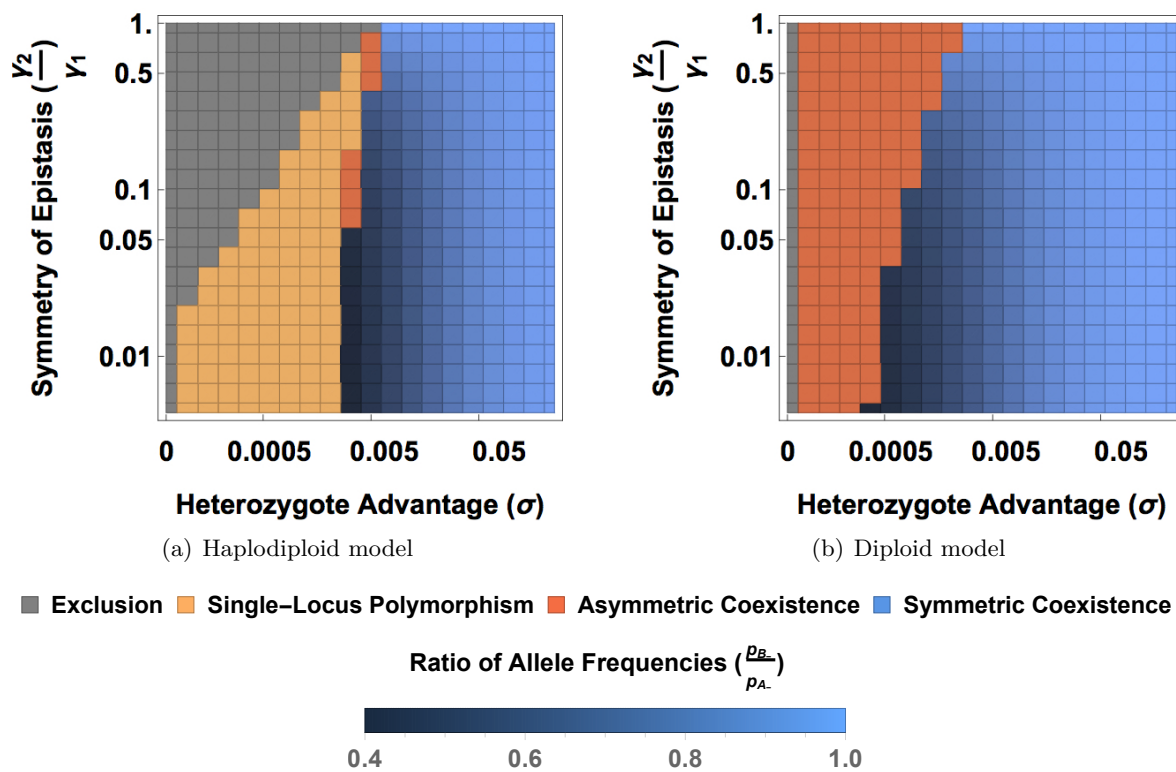

Figure 5: More evolutionary outcomes are possible in (a) the haplodiploid than (b) the diploid model. The y-axis shows the ratio of the two epistasis parameters ( $\frac{\gamma_2}{\gamma_1}$ ) for a constant value of  $\gamma_1 = 0.01$ , thus it represents the degree of asymmetry of epistasis. For symmetric coexistence, the locally stable equilibrium can be at any point on the diagonal  $p_{B_-} = 1 - p_{A_-}$ , where  $p_{A_-}$  and  $p_{B_-}$  denote the allele frequencies of the  $-$  allele at the respective locus. Blue shading illustrates the location of the equilibrium at symmetric coexistence: darker shades correspond to a bigger disparity in allele frequencies. This is the case when the asymmetry of the two epistasis parameters is large (i.e. smaller values on the y-axis) because smaller values of  $\gamma_2$  favor the  $A_-B_+$  haplotype over the  $A_+B_-$  haplotype. (Here,  $\gamma_1 = 0.01$ ,  $\rho = 0.5$ ,  $\alpha = 0$ .)

413 In the diploid model, a single-locus polymorphism is never stable: Assume locus  $A$  is  
414 polymorphic and locus  $B$  is fixed for allele  $B_+$ . Then, a new mutant carrying allele  $B_-$  will  
415 always have a selective advantage regardless of the genotype in which it first appears (Table  
416 S3). In contrast, in the haplodiploid model, this is no longer true as the mutant carrying  
417 allele  $B_-$  will have a much lower fitness in males when associated to allele  $A_+$ . Therefore, if  
418 the cost of generating this unfit haplotype in males overrides the advantage in females, and  
419 allele  $A_+$  is at high frequency, then invasion of the  $B_+$  mutant may be prevented, leading to  
420 the stability of the single-locus polymorphism.

421 When polymorphism is maintained at both loci at equilibrium (i.e., asymmetric and  
422 symmetric coexistence), epistasis creates associations between the compatible alleles which  
423 results in elevated linkage disequilibrium (LD). Recombination breaks the association between  
424 alleles, thus high recombination decreases normalized LD ( $D'$ , where  $D' = \frac{LD}{D_{max}}$ ; Fig. S5).  
425  $D'$  increases with the strength of heterozygote advantage at low recombination rates, because  
426 it maximizes the discrepancy between highly fit double-heterozygote females that can, under  
427 low recombination rate still produce many fit male offspring, and introgressed females, who

428 are less fit and produce many unfit hybrid males.

429 In Figure S6, we compare the normalized LD (i.e.  $D'$ ) between the haplodiploid and  
430 diploid models. When polymorphism is maintained at both loci in both the haplodiploid  
431 and diploid model, normalized LD is always larger in haplodiploids than diploids. The dif-  
432 ference in normalized LD between haplodiploids and diploids is maximized for intermediate  
433 recombination rates, where recombination is strong enough to induce the conflict between  
434 heterozygote advantage and hybrid incompatibility, but not efficient enough to break the  
435 arising associations. Due to the increased selection against hybrid incompatibility in hap-  
436 loid males in the haplodiploid model, the normalized LD is usually 2-3 times higher in the  
437 haplodiploid as compared with the diploid model.

438 Thus, the hybrid incompatibility leaves a statistical signature in a population, even if the  
439 population finds itself at an equilibrium. The increased association across the genome, exhib-  
440 ited if the interacting loci are on the same chromosome, may also result in an underestimate  
441 of the recombination rate. Although both the diploid and the haplodiploid models display the  
442 elevated LD signal, it is much more pronounced in the haplodiploid scenario. This is because  
443 only an eighth of the possible diploid male genotypes suffer the cost of the incompatibility as  
444 compared to half of the possible haploid male genotypes.

#### 445 Fitting the model to natural population frequencies

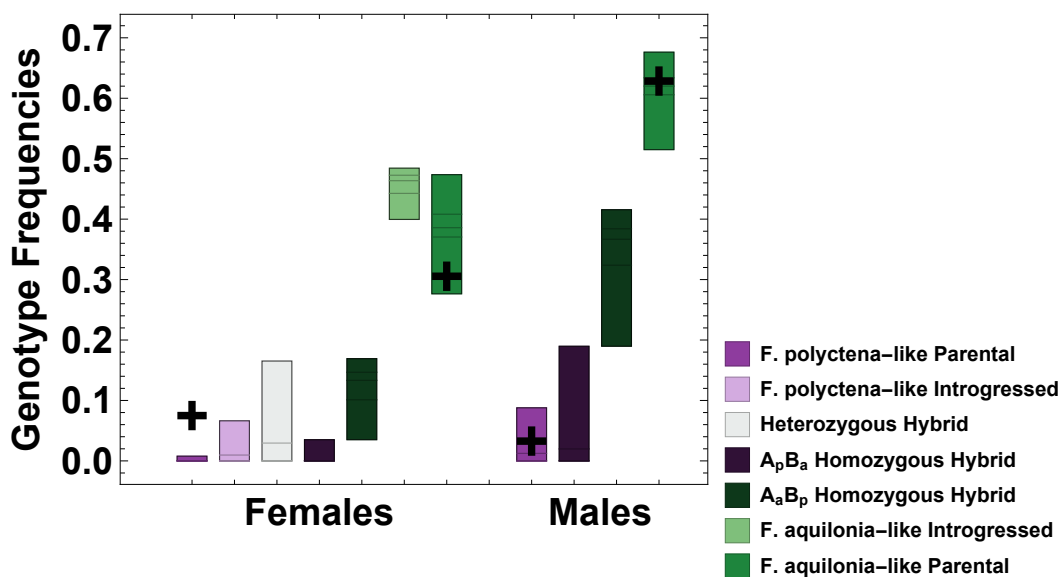

Figure 6: Comparison of model predictions (boxplots) to the data used for fitting the model (+) shows that the model is able to capture the high frequency of *F. aquilona*-like alleles (green shades) in the population. Boxplots show the genotype frequencies for females and males before selection that are predicted from the distribution of the best fitting models. In this case parental genotype frequencies (shown on plot as +) are estimated using individuals with one or more loci homozygous for the parental allele.

446 We compared the pre- and post-selection haplodiploid model (Fig. S1(a)) predictions with  
447 the estimated genotype frequencies of the natural, hybridizing *Formica* wood ant population  
448 for eggs and reproductive life-stages of males and females (Table S2). The model predictions  
449 from the best-fit models are shown in Figures 6, S7, and S8. The best-fit models had paramete-  
450 ter values corresponding to single-locus polymorphism or asymmetric coexistence, regardless



451 of how the female frequencies were estimated (Fig. S9). Since these outcomes can occur at a  
452 variety of parameter combinations, we were not able to infer any specific parameter estimates  
453 other than that large values appear to be preferred for  $\gamma_1$  and recombination (Fig. S10-S13),  
454 consistent with the genomic architecture of the natural population, where multiple incompat-  
455 ibilities are likely to be spread across chromosomes (Kulmuni and Pamilo, 2014). Our model  
456 predicts less change in the genotype frequencies before vs. after selection as compared to the  
457 differential observed in the data for eggs vs. reproductive adults (Fig. S7(c) and S8(b)).

## 458 Discussion

459 Multiple recent studies have highlighted the pervasive nature of hybridization and its po-  
460 tential consequences for diversification and speciation (Abbott et al., 2013; Runemark et al.,  
461 2017; Montecinos et al., 2017). We here modeled the fate of a hybrid population in a scenario  
462 in which hybridization is simultaneously favored and selected against, inspired by a natural  
463 population of hybrid ants that simultaneously displays heterosis and hybrid incompatibility.  
464 In addition, both adaptive introgression and hybrid incompatibilities have been identified in  
465 natural systems (Heliconius Genome Consortium, 2012; Whitney et al., 2015; Corbett-Detig  
466 et al., 2013) and thus it is likely that both processes may occur simultaneously during a single  
467 hybridization event resulting in a ‘genomic conflict’. Furthermore, we were interested in com-  
468 paring the long-term resolutions to this genomic conflict under different ploidies (haplodiploid  
469 versus diploid), since it has been argued that haplodiploids might speciate more easily than  
470 diploids (Lohse and Ross, 2015). Finally, the comparison of ploidies can also be transferred  
471 to the case of diploid species, in which the genomic conflict appears on the X/Z chromosome  
472 as compared with the autosomes.

473 Our model considers a population in which heterozygote advantage and hybrid incom-  
474 patibility act simultaneously on the same pair of loci, creating a rugged fitness landscape  
475 with a ridge of high-fitness heterozygote genotypes, adjacent to which there are holes of in-  
476 compatible double homozygotes (Fig. 1(a)). Fundamentally, in haplodiploids, where females  
477 are diploid and males are haploid, this creates a situation in which males cannot profit from  
478 heterozygote advantage but suffer strongly from hybrid incompatibility (Fig. 1(b)). Thus, the  
479 studied fitness landscape, which creates a genomic conflict in diploids of both sexes, creates  
480 a sexual conflict in haplodiploids, where males survive best if diversity is purged whereas  
481 females profit from maximum heterozygosity.

482 We found that in the haplodiploid model, there exist four different stable outcomes for  
483 sexual conflict over hybrid status (Fig. 2): exclusion, where “males win”; symmetric coexis-  
484 tence, where “females win”; and two outcomes, single-locus polymorphism and asymmetric  
485 coexistence, where a compromise between male costs and female benefits is mediated by high  
486 frequencies of introgressed females. In fact, since low-frequency heterozygotes are favored  
487 both in males and in females in the diploid model, while only suffering the hybrid cost if  
488 introgressed alleles rise to high frequencies, exclusion and single-locus polymorphism never  
489 occur in the diploid model, reducing the number of possible outcomes to asymmetric and  
490 symmetric coexistence. Thus, consistent with Pamilo (1979); Pamilo and Crozier (1981);  
491 Patten et al. (2015), we found that introgression and maintenance of polymorphism, and  
492 thus long-term hybridization, are less likely in haplodiploids as compared to diploids.

493 Prior work has found that in haplodiploid species sexual conflict tends to be resolved in  
494 favor of females because genes spend two thirds of their time in females (Albert and Otto,  
495 2005). For several scenarios, we here derived the conditions for either type of solution. We  
496 find, that in addition to the strength of selection, recombination is a major player (cf. Fig. 3  
497 and equation 6); the conflict is only expressed in the first place, if recombination breaks

498 up gametes and causes the incompatibilities to be expressed. With free recombination, i.e.,  
499 if the interacting genes are found on separate chromosomes, heterozygote advantage has to  
500 be very strong to counteract the hybrid incompatibility. We find that it has to be on the  
501 same order of magnitude than the strength of the incompatibility, but can be slightly lower  
502 in its absolute value. For example, heterozygote advantage of strength 41% is sufficient to  
503 result in symmetric coexistence even if the incompatibility is lethal (Fig. 3B). Thus, under  
504 consideration of absolute magnitude, our results are consistent with prior work. However,  
505 reported cases and potential mechanisms of hybrid incompatibility indicate that large effects  
506 are feasible, whereas observed cases of heterozygote advantage or heterosis of large effect  
507 are relatively rare (Hedrick, 2012). Thus, it may well be that under natural circumstances,  
508 the conflict modeled here may indeed be likely to be resolved via purging of at least one  
509 incompatible allele and thus in favor of males.

510 As expected in the presence of epistasis, we observed that linkage disequilibrium (LD)  
511 is elevated at all polymorphic stable states (i.e., for symmetric and asymmetric coexistence)  
512 both in the diploid and haplodiploid models, especially at intermediate recombination rates.  
513 This is particularly true for haplodiploids, which display about 2-3 times the LD of the diploid  
514 model with the same parameters. Transferred to the context of X/Z chromosomes, this is  
515 consistent with observations of larger LD on the X chromosome as compared with autosomes.  
516 It has been argued that this is because selection is more effective on X-linked loci: recessive  
517 deleterious mutations are more visible to selection in haploid individuals (Charlesworth et al.,  
518 1987). However, a hybrid incompatibility accompanied by heterosis/heterozygote advantage  
519 as in our model may not be purged, but create a continuous high-LD signal in an equilibrium  
520 population, thus potentially resulting in less efficient recombination and in underestimates of  
521 recombination rates on X chromosomes (because recombined individuals are not observed).

522 Exclusion remains a stable solution when we extend the model to multiple loci and in-  
523 compatibilities. We describe an interesting difference between multiple independent pairs  
524 of incompatibilities, and multiple loci that all interact with each other: in the latter case,  
525 exclusion becomes increasingly probable because the number of viable males decreases. This  
526 scenario of higher-order epistasis has recently received attention with regards to speciation  
527 (Paixão et al., 2014; Fraïsse et al., 2014), and it will be interesting to identify molecular  
528 scenarios (for example, involving biological pathways) that could result in such incompat-  
529 abilities in the future. In contrast, exclusion becomes less likely in the case of independent  
530 incompatibility pairs, where each incompatibility has to be purged independently in the same  
531 direction for exclusion to occur. Here, mechanisms that reduce the recombination rate, such  
532 as inversions, could potentially invade and tilt the balance towards coexistence and thus  
533 maintenance of polymorphism in the hybrid population. It is important to note that the in-  
534 dependent purging of incompatibilities is only true in effectively infinite-sized populations.  
535 Thus, we expect that exclusion becomes a more likely scenario in small populations, especially  
536 if lethal incompatibility pairs are present.

## 537 **Model assumptions**

538 We chose a classical population-genetic modeling approach (Bürger, 2000; Nagylaki et al.,  
539 1992) to study how a specific type of genomic conflict between heterozygote advantage and  
540 hybrid incompatibility can be resolved in a hybrid population. By treating the problem in a  
541 deterministic framework and considering only two loci throughout most of the manuscript,  
542 we vastly oversimplify the situation in the natural population that our model was inspired  
543 by. However, at the same time this allowed us to gain a general insight in how the ge-  
544 nomic (and, in haplodiploids, sexual) conflict may be resolved, often expressed by means of  
545 analytical expressions. In addition to some obvious mechanisms at play in natural popu-

546 lations, which we ignore in our model (e.g., random genetic drift), some extensions of the  
547 model could be interesting to elaborate on in the future. For example, the ant populations  
548 represent networks of interacting nests with many queens per nest, but potentially different  
549 hatching/development times depending on sun exposure in the spring. In addition, males  
550 are the sex that is in greater abundance and that tends to migrate between nests. Thus, for  
551 the purpose of population-genetic inference of the evolutionary history (and potential evolu-  
552 tionary fate) of the hybrid ant population in Finland, it would be desirable to incorporate  
553 population structure, uneven sex ratios, and sex-biased dispersal into the model, and obtain  
554 population-genomic data to infer evolutionary parameters.

### 555 **Is the natural population at an equilibrium of asymmetric coexistence?**

556 Model fitting results to the data from Table S2 are inconclusive about the fate of the natu-  
557 ral ant population that inspired our model. Our results suggest that it might be approaching  
558 an evolutionary outcome that allows a compromise between male and female interests; either  
559 as single-locus polymorphism or via asymmetric coexistence.

560 However, we fitted our model to the data from the natural ant population described in  
561 Kulmuni and Pamilo (2014) and Table S1 in a rather crude approach. In the fitting procedure,  
562 we ignored that the data contain information from marker loci rather than the selected alleles,  
563 and we summarized the data in categories to resemble our case of a two-locus interaction.  
564 Our model fitting results indicate that the unequal ratio of *F. polyctena*-like and *F. aquilona*-  
565 like types that is observed in the natural population could represent a stable equilibrium  
566 of asymmetric coexistence. In fact, the high recombination rates among diagnostic alleles  
567 and strong prezygotic mechanisms producing within-group zygotes exhibited in the natural  
568 population Kulmuni et al. (2010); Kulmuni and Pamilo (2014) correspond with an area in the  
569 parameter space where asymmetric coexistence can be stably maintained over a wide range  
570 of values for female hybrid advantage.

571 Our model fit does not perform well at predicting the number of introgressed and hybrid  
572 females in the population. We were not able to estimate the population frequencies for intro-  
573 gressed and hybrid females with data from Kulmuni and Pamilo (2014), but we know from  
574 Kulmuni et al. (2010) that the vast majority of both *F. polyctena*-like and *F. aquilona*-like  
575 females exhibit some introgression. Contrary to this observation in the natural population,  
576 our model fit predicts that introgressed *F. polyctena*-like females should be rare ( $< 15\%$ ) and  
577 that pure *F. aquilona*-like females should be only slightly less common than the introgressed  
578 *F. polyctena*-like females (Fig. 6). More complex models, for example including more than  
579 two incompatibility loci, may be better able to explain the high frequencies of introgressed  
580 females observed in the natural hybrid population. As argued in the Results, interactions at  
581 or between multiple loci should result in steeper differences of introgressed-allele frequencies  
582 across life stages than our model is able to produce.

### 583 **Implications for hybrid speciation**

584 Our model illustrates how a genomic conflict between heterozygote advantage and hybrid  
585 incompatibility is resolved in haplodiploid and diploid populations. We can hypothesize how  
586 these different outcomes may provide an engine to hybrid speciation, or which other long-  
587 term evolutionary scenarios we expect to arise. The case of exclusion, which is possible only  
588 in the haplodiploid model, will lead to loss of diversity in the hybrid population, and, in the  
589 two-locus case, should result in the reversion of the hybrid population into one of its parental  
590 species. However, if multiple pairs of interacting loci are resolved independently, they may  
591 be purged randomly towards either parent, which could result in a true hybrid species that is

592 isolated from both its parental species (Buerkle et al., 2000; Butlin and Ritchie, 2013; Schumer  
593 et al., 2015). In fact, our finding that exclusion is less likely to occur in populations with  
594 multiple pairs of interacting loci may result from exactly this mechanism, but it is beyond  
595 the scope of this manuscript to explore this further.

596 The long-term fate of the population is less straightforward to anticipate in the case of  
597 polymorphic stable equilibria. For any of these, heterozygote advantage is strong enough  
598 to stabilize the polymorphism either at one or both loci. Thus, without further occurrence  
599 of functional mutations, males (in the haplodiploid model) and double-homozygotes for the  
600 incompatible alleles will continue to suffer a potentially large fitness cost. Mechanisms that  
601 could reduce this cost would be increased assortative mating or decreased recombination.  
602 However, none of these would necessarily cause isolation from the parental species, unless  
603 they involved additional hybrid incompatibilities which isolate the hybrid population from  
604 its parental species. Alternatively, mutations that lower the hybrid fitness cost could invade,  
605 which will result in a weakening of species barriers and promote further introgression from  
606 the parental species. This indicates that any scenario in which polymorphic equilibria are  
607 stable may indeed be an unlikely candidate for hybrid speciation. Considering that such  
608 stable polymorphism (either as symmetric or asymmetric coexistence) is the only possible  
609 outcome in the diploid model, this results in the prediction that hybrid speciation would be  
610 more likely in a haplodiploid scenario. This is an interesting observation that is in line with  
611 other predictions that haplodiploids speciate more easily, that X/Z chromosomes are engines  
612 of speciation (Lima, 2014), and that hybrid speciation is rare (Schumer et al., 2014).

### 613 **Relevance of the model for sex chromosomes**

614 Haplodiploids and X/Z chromosomes have a similar mode of inheritance, where one sex  
615 carries a single copy of the chromosome, and the other carries two copies. Therefore, our  
616 results apply equally to cases of X-to-X or Z-to-Z hybrid incompatibilities (Lohse and Ross,  
617 2015). Although haplodiploid systems do not include all of the unique evolutionary phe-  
618 nomena exhibited by sex chromosomes (Abbott et al., 2017), our results for haplodiploids  
619 are relevant for sex chromosomes. Our model predicts how a conflict between heterozygote  
620 advantage and hybrid incompatibilities will be resolved, and indicates the signatures that this  
621 type of fitness landscape could leave depending on whether it finds itself on an X chromosome  
622 or an autosome.

623 Firstly, as argued above, what is a genomic conflict between heterozygote advantage and  
624 hybrid incompatibility on autosomes/in diploids becomes a sexual conflict on the X chromo-  
625 some/in haplodiploids. Thus, the same fitness landscape that would be well masked on an  
626 autosome and result in a stable polymorphism, would create a signal of sexually antagonistic  
627 selection on an X chromosome. Most importantly, this signal is created without the need  
628 for direct sexually antagonistic selection on single functional genes that have a sex-specific  
629 antagonistic effect. Thus, our model proposes an additional mechanism by which sex chro-  
630 mosomes can appear as hot spot of sexual conflict (e.g., Gibson et al., 2002; Pischedda and  
631 Chippindale, 2006).

632 Secondly, we find that purging of incompatibilities is more likely in the haplodiploid model,  
633 and thus on X/W chromosomes. This is consistent with the faster-X theory (Charlesworth  
634 et al., 1987). However, we only if recombination is strong enough, incompatibilities will  
635 become visible to selection and purged in the presence of heterozygote advantage. If they  
636 are not purged, they may persist in a long-term polymorphism, invisible to most empirical  
637 approaches, and confound population-genetic inference by creating signals of elevated linkage  
638 disequilibrium.

## 639 Conclusion

640 Hybridization is observed frequently in natural populations, and can have both deleterious  
641 and advantageous effects. We here showed how diverse outcomes are produced even under  
642 a rather simple model of a single hybrid population, in which heterozygote advantage and  
643 hybrid incompatibility are occurring at the same time. Consistent with previous theory on  
644 haplodiploids and X/Z chromosomes, we found that incompatible alleles are more likely to  
645 be purged in a haplodiploid than in a diploid model. Nevertheless, our results suggest that  
646 long-term hybridization can occur even in the presence of hybrid incompatibility, and if there  
647 are many incompatibility pairs or many loci involved in the incompatibility. The evolutionary  
648 fate of the Finnish hybrid population that our model was inspired by is difficult to predict;  
649 further population-genetic analysis will be necessary to gain a more complete picture of its  
650 structure and evolutionary history.

## 651 Acknowledgements

652 We thank Laura Cêtre for her work on a previous version of the model. We thank Pekka  
653 Pamilo and the members of the Bank and Kulmuni labs for discussion of the manuscript. This  
654 research was supported by the Fundação Calouste Gulbenkian and in part by the National  
655 Science Foundation under Grant No. NSF PHY-1125915. JK was supported by the Human  
656 Frontier Science Program, Finnish Cultural Foundation, Academy of Finland (252411 to CoE  
657 in Biological Interactions).

## 658 Data Accessibility

659 The complete documentation of all steps of the analysis is available as a Mathematica  
660 Online Supplement. Ant colony data is provided as Supplementary Table S1; genotype  
661 frequency data were obtained from Kulmuni and Pamilo (2014).

## 662 Author Contributions

663 CB, JK, and RB designed research, AB and CB developed the models, AHG performed  
664 simulations and data analysis, all authors interpreted the results and wrote the manuscript.

## 665 Bibliography

- 666 Abbott, J., Nordén, A., and Hansson, B. (2017). Sex chromosome evolution: Historical  
667 insights and future perspectives. *Proceedings of the Royal Society of London B: Biological*  
668 *Sciences*, 284(1854):20162806.
- 669 Abbott, R., Albach, D., Ansell, S., Arntzen, J. W., Baird, S. J. E., Bierne, N., Boughman, J.,  
670 Brelsford, A., Buerkle, C. A., Buggs, R., Butlin, R. K., Dieckmann, U., Eroukhanoff, F.,  
671 Grill, A., Cahan, S. H., Hermansen, J. S., Hewitt, G., Hudson, A. G., Jiggins, C., Jones,  
672 J., Keller, B., Marczewski, T., Mallet, J., Martinez-Rodriguez, P., Möst, M., Mullen, S.,  
673 Nichols, R., Nolte, A. W., Parisod, C., Pfennig, K., Rice, A. M., Ritchie, M. G., Seifert,  
674 B., Smadja, C. M., Stelkens, R., Szymura, J. M., Väinölä, R., Wolf, J. B. W., and Zinner,  
675 D. (2013). Hybridization and speciation. *Journal of Evolutionary Biology*, 26(2):229–246.
- 676 Albert, A. and Otto, S. (2005). Sexual selection can resolve sex-linked sexual antagonism.  
677 *Science*, 310(5745):119–121.

- 678 Bateson, W. (1909). Heredity and variation in modern lights. *Darwin and modern science*,  
679 pages 85–101.
- 680 Beresford, J., Elias, M., Pluckrose, L., Sundström, L., Butlin, R., Pamilo, P., and Kulmuni,  
681 J. (2017). Widespread hybridization within mound-building wood ants in Southern Fin-  
682 land results in cytonuclear mismatches and potential for sex-specific hybrid breakdown.  
683 *Molecular Ecology*, 26(15):4013–26.
- 684 Bernardes, J., Stelkens, R., and Greig, D. (2017). Heterosis in hybrids within and between  
685 yeast species. *Journal of Evolutionary Biology*, 30(3):538–548.
- 686 Buerkle, C. A., Morris, R. J., Asmussen, M. A., and Rieseberg, L. H. (2000). The likelihood  
687 of homoploid hybrid speciation. *Heredity*, 84(4):441–451.
- 688 Bürger, R. (2000). *The mathematical theory of selection, recombination, and mutation*, vol-  
689 ume 228. Wiley Chichester.
- 690 Butlin, R. K. and Ritchie, M. G. (2013). Pulling together or pulling apart: hybridization in  
691 theory and practice. *Journal of Evolutionary Biology*, 26(2):294–298.
- 692 Charlesworth, B., Coyne, J., and Barton, N. (1987). The relative rates of evolution of sex  
693 chromosomes and autosomes. *The American Naturalist*, 130(1):113–146.
- 694 Chen, C., Zhiguo, E., and Lin, H.-X. (2016). Evolution and molecular control of hybrid  
695 incompatibility in plants. *Frontiers in Plant Science*, 7:1208.
- 696 Chen, Z. (2013). Genomic and epigenetic insights into the molecular bases of heterosis. *Nature*  
697 *Review Genetics*, 14(7):471–482.
- 698 Corbett-Detig, R. B., Zhou, J., Clark, A. G., Hartl, D. L., and Ayroles, J. F. (2013). Genetic  
699 incompatibilities are widespread within species. *Nature*, 504(7478):135–7.
- 700 Crozier, R. and Pamilo, P. (1996). *Evolution of social insect colonies: Sex allocation and kin*  
701 *selection*. Oxford University Press, Oxford, UK.
- 702 De Cara, M., Barton, N., and Kirkpatrick, M. (2008). A model for the evolution of assortative  
703 mating. *The American Naturalist*, 171(5):580–596.
- 704 de la Filia, A., Bain, S., and Ross, L. (2015). Haplodiploidy and the reproductive ecology of  
705 arthropods. *Current Opinion in Insect Science*, 9:36–43.
- 706 Dieckmann, U. and Doebeli, M. (1999). On the origin of species by sympatric speciation.  
707 *Nature*, 400(6742):354–357.
- 708 Dobzhansky, T. (1936). Studies on hybrid sterility. II. Localization of sterility factors in  
709 *Drosophila pseudoobscura* hybrids. *Genetics*, 21(2):113.
- 710 Evans, J., Shearman, D., and Oldroyd, B. (2004). Molecular basis of sex determination in  
711 haplodiploids. *Trends in Ecology and Evolution*, 19(1):1–3.
- 712 Fraïsse, C., Elderfield, J., and Welch, J. (2014). The genetics of speciation: are complex  
713 incompatibilities easier to evolve? *Journal of Evolutionary Biology*, 27(4):688–99.
- 714 Gibson, J., Chippindale, A., and Rice, W. (2002). The X chromosome is a hot spot for  
715 sexually antagonistic fitness variation. *Proceedings of the Royal Society of London B:*  
716 *Biological Sciences*, 269(1490):499–505.

- 717 Hedrick, P. W. (2012). What is the evidence for heterozygote advantage selection? *Trends*  
718 *in Ecology & Evolution*, 27(12):698–704.
- 719 Heliconius Genome Consortium (2012). Butterfly genome reveals promiscuous exchange of  
720 mimicry adaptations among species. *Nature*, 487(7405):94.
- 721 Höllinger, I. and Hermisson, J. (2017). Bounds to parapatric speciation: A Dobzhan-  
722 sky–Muller incompatibility model involving autosomes, X chromosomes, and mitochondria.  
723 *Evolution*, 71(5):1366–1380.
- 724 Jablonka, E. and Lamb, M. J. (1991). Sex Chromosomes and Speciation. *Proceedings of the*  
725 *Royal Society B: Biological Sciences*, 243(1308):203–208.
- 726 Johnson, N. A. and Lachance, J. (2012). The genetics of sex chromosomes: evolution and  
727 implications for hybrid incompatibility. *Annals of the New York Academy of Sciences*,  
728 1256(1):E1–E22.
- 729 Knecht, B., Potter, T., Pearson, N., Sato, Y., Staudacher, H., Schimmel, B., Kiers, E., and  
730 Egas, M. (2017). Detection of genetic incompatibilities in non-model systems using simple  
731 genetic markers: hybrid breakdown in the haplodiploid spider mite tetranychus evansi.  
732 *Heredity*, 118(4):311.
- 733 Koevoets, T. and Beukeboom, L. (2009). Genetics of postzygotic isolation and Haldane’s rule  
734 in haplodiploids. *Heredity*, 102(1):16–23.
- 735 Kopp, M., Servedio, M. S., Mendelson, T. C., Safran, R. J., Rodríguez, R. L., Scordato, E. C.,  
736 Symes, L. B., Balakrishnan, C. N., Hauber, M. E., Zonana, D. M., and van Doorn, G. S.  
737 Mechanisms of assortative mating in speciation: connecting theory and empirical research.  
738 *The American Naturalist*.
- 739 Kraaijeveld, K. (2009). Male genes with nowhere to hide; sexual conflict in haplodiploids.  
740 *Animal Biology*, 59(4):403–415.
- 741 Kulmuni, J. and Pamilo, P. (2014). Introgression in hybrid ants is favored in females but  
742 selected against in males. *Proceedings of the National Academy of Sciences*, 111(35):12805–  
743 10.
- 744 Kulmuni, J., Seifert, B., and Pamilo, P. (2010). Segregation distortion causes large-scale  
745 differences between male and female genomes in hybrid ants. *Proceedings of the National*  
746 *Academy of Sciences*, 107(16):7371–6.
- 747 Lima, T. G. (2014). Higher levels of sex chromosome heteromorphism are associated with  
748 markedly stronger reproductive isolation. *Nature Communications*, 5:4743.
- 749 Lohse, K. and Ross, L. (2015). What haplodiploids can teach us about hybridization and  
750 speciation. *Molecular Ecology*, 24(20):5075–5077.
- 751 Mallet, J. (2005). Hybridization as an invasion of the genome. *Trends in Ecology and Evolution*,  
752 20(5):229–237.
- 753 Montecinos, A. E., Guillemin, M.-L., Couceiro, L., Peters, A. F., Stoeckel, S., and Valero, M.  
754 (2017). Hybridization between two cryptic filamentous brown seaweeds along the shore:  
755 analysing pre- and postzygotic barriers in populations of individuals with varying ploidy  
756 levels. *Molecular Ecology*, 26(13):3497–3512.

- 757 Muller, H. (1942). Isolating mechanisms, evolution and temperature. In *Biology Symposium*,  
758 volume 6, pages 71–125.
- 759 Nagylaki, T. et al. (1992). *Introduction to theoretical population genetics*, volume 142.  
760 Springer-Verlag Berlin.
- 761 Orr, H. (1995). The population genetics of speciation: The evolution of hybrid incompatibil-  
762 ities. *Genetics*, 139(4):1805–1813.
- 763 Paixão, T., Bassler, K. E., and Azevedo, R. B. R. (2014). Emergent speciation by multiple  
764 Dobzhansky-Muller incompatibilities. *bioRxiv*, page 8268.
- 765 Pamilo, P. (1979). Genic variation at sex-linked loci: Quantification of regular selection  
766 models. *Hereditas*, 91(1):129–133.
- 767 Pamilo, P. and Crozier, R. H. (1981). Genic variation in male haploids under deterministic  
768 selection. *Genetics*, 98(1):199–214.
- 769 Patten, M., Carioscia, S., and Linnen, C. (2015). Biased introgression of mitochondrial and  
770 nuclear genes: A comparison of diploid and haplodiploid systems. *Molecular Ecology*,  
771 24(20):5200–5210.
- 772 Pischedda, A. and Chippindale, A. K. (2006). Intralocus sexual conflict diminishes the ben-  
773 efits of sexual selection. *PLoS biology*, 4(11):e356.
- 774 Presgraves, D. (2008). Sex chromosomes and speciation in *Drosophila*. *Trends in Genetics*,  
775 24(7):336–343.
- 776 Runemark, A., Trier, C. N., Eroukhanoff, F., Hermansen, J. S., Matschiner, M., Ravinet,  
777 M., Elgvin, T. O., and Saetre, G.-P. (2017). Variation and constraints in hybrid genome  
778 formation. *bioRxiv*, page 107508.
- 779 Schluter, D. (2009). Evidence for ecological speciation and its alternative. *Science*,  
780 323(5915):737–741.
- 781 Schluter, D. and Conte, G. (2009). Genetics and ecological speciation. *Proceedings of the*  
782 *National Academy of Sciences*, 106(Supplement 1):9955–9962.
- 783 Schumer, M., Cui, R., Rosenthal, G. G., and Andolfatto, P. (2015). Reproductive isolation  
784 of hybrid populations driven by genetic incompatibilities. *PLOS Genetics*, 11(3):1–21.
- 785 Schumer, M., Rosenthal, G., and Andolfatto, P. (2014). How common is homoploid hybrid  
786 speciation? *Evolution*, 68(6):1553–1560.
- 787 Schwarz, D., Matta, B., Shakir-Botteri, N., and McPheron, B. (2005). Host shift to an  
788 invasive plant triggers rapid animal hybrid speciation. *Nature*, 436(7050):546–9.
- 789 Seehausen, O., Butlin, R., Keller, I., Wagner, C., Boughman, J., Hohenlohe, P., Peichel, C.,  
790 Saetre, G.-P., Bank, C., Brännström, Å., Brelsford, A., Clarkson, C., Eroukhanoff, F.,  
791 Feder, J., Fischer, M., Foote, A., Franchini, P., et al. (2014). Genomics and the origin of  
792 species. *Nature Reviews Genetics*, 15(3):176–192.
- 793 Servedio, M. and Noor, M. (2003). The role of reinforcement in speciation: theory and data.  
794 *Annual Review of Ecology, Evolution, and Systematics*, 34(1):339–364.



- 795 Song, Y., Endepols, S., Klemann, N., Richter, D., Matuschka, F.-R., Shih, C.-H., Nachman,  
796 M., and Kohn, M. (2011). Adaptive introgression of anticoagulant rodent poison resistance  
797 by hybridization between old world mice. *Current Biology*, 21(15):1296–1301.
- 798 Suomalainen, E., Saura, A., and Lokki, J. (1987). *Cytology and evolution in parthenogenesis*.  
799 CRC Press, Boca Raton, Florida.
- 800 Whitney, K., Randell, R., and Rieseberg, L. (2010). Adaptive introgression of abiotic toler-  
801 ance traits in the sunflower *Helianthus annuus*. *New Phytologist*, 187(1):230–239.
- 802 Whitney, K. D., Broman, K. W., Kane, N. C., Hovick, S. M., Randell, R. A., and Riese-  
803 berg, L. H. (2015). Quantitative trait locus mapping identifies candidate alleles involved  
804 in adaptive introgression and range expansion in a wild sunflower. *Molecular Ecology*,  
805 24(9):2194–2211.
- 806 Wolf, D., Takebayashi, N., and Rieseberg, L. (2001). Predicting the risk of extinction through  
807 hybridization. *Conservation Biology*, 15(4):1039–1053.
- 808 Wolfram Research, Inc. (2016). Mathematica v. 10.4.1.0. Champaign, Illinois, USA.  
809 <https://www.wolfram.com>.
